# Supplementary material
Source: Springer Nature journal article supplement (https://www.springermedizin.de/resource/supplementary/13643_2012_50_MOESM6_ESM.pdf/9681370)
Supplement: MOESM6 [file 9681370]

## Annotation of intervention studies: Summary against adaptive mechanisms

**Key:** sound (+++), moderate (++) , partial (+) or no evidence (X)

| First Author & Location                                     | Intervention                                                                                                                                     | Adaptation of intervention activities to increase cultural appropriateness                                                                      | Mechanisms of adaptation 'authenticity' | Mechanisms of adaptation 'understanding' | Mechanisms of adaptation 'consonance' | Mechanisms of adaptation 'specificity' | Mechanisms of adaptation 'embeddedness' | Mechanisms of adaptation 'endorsement' | Mechanisms of adaptation 'framing' |
|-------------------------------------------------------------|--------------------------------------------------------------------------------------------------------------------------------------------------|-------------------------------------------------------------------------------------------------------------------------------------------------|-----------------------------------------|------------------------------------------|---------------------------------------|----------------------------------------|-----------------------------------------|----------------------------------------|------------------------------------|
| <b>Amaro (2002)</b><br><b>Boston, USA</b>                   | Comparison of two interventions for immigrant women:<br>1. HIV-specific with participatory education;<br>2. women's health specific and didactic | Language (Spanish)                                                                                                                              |                                         |                                          |                                       |                                        |                                         |                                        |                                    |
|                                                             |                                                                                                                                                  | Bilingual Community Educators (BCEs) – to facilitate groups                                                                                     | 1. +++                                  | 1. +++                                   | 1. +++                                | 1.++                                   | 1. ++                                   | 1.X                                    | 1. X                               |
|                                                             |                                                                                                                                                  | Gender - of facilitator                                                                                                                         |                                         |                                          |                                       |                                        |                                         |                                        |                                    |
|                                                             |                                                                                                                                                  | Content-used 'cultural elements' in curriculum                                                                                                  | 2. +++                                  | 2. +++                                   | 2. +++                                | 2. ++                                  | 2.+                                     | 2. X                                   | 2. X                               |
|                                                             | Each intervention<br>12 group sessions & 16 hours of content - focus on sexual risk reduction                                                    |                                                                                                                                                 |                                         |                                          |                                       |                                        |                                         |                                        |                                    |
| <b>Carballo-Diequez (2005)</b><br><b>New York City, USA</b> | 8 group sessions with a focus on sexual risk reduction for immigrant gay men                                                                     | Language (Spanish)<br>Bilingual Community Educators (BCEs)<br>Gender & sexuality - of facilitator<br>Content – use of 'dichos' Spanish proverbs | +++                                     | +++                                      | +++                                   | ++                                     | ++                                      | ++                                     | +                                  |

| <b>First Author &amp; Location</b>    | <b>Intervention</b>                                                                                                                                                                                         | <b>Adaptation of intervention activities to increase cultural appropriateness</b>                                                                                                                                                                                                                    | <b>Mechanisms of adaptation ‘authenticity’</b> | <b>Mechanisms of adaptation ‘understanding’</b> | <b>Mechanisms of adaptation ‘consonance’</b> | <b>Mechanisms of adaptation ‘specificity’</b> | <b>Mechanisms of adaptation ‘embeddedness’</b> | <b>Mechanisms of adaptation ‘endorsement’</b> | <b>Mechanisms of adaptation ‘framing’</b> |
|---------------------------------------|-------------------------------------------------------------------------------------------------------------------------------------------------------------------------------------------------------------|------------------------------------------------------------------------------------------------------------------------------------------------------------------------------------------------------------------------------------------------------------------------------------------------------|------------------------------------------------|-------------------------------------------------|----------------------------------------------|-----------------------------------------------|------------------------------------------------|-----------------------------------------------|-------------------------------------------|
| <b>Chemtov (1993) Israel</b>          | 200 group sessions to raise awareness of HIV/AIDS in a newly arrived immigrant community<br><br>A range of supporting activities (e.g. health promotion resources) to reach 24,000 newly arrived immigrants | Language (Amharic)<br><br>Bilingual Community Educators (BCEs) – trained 34 ‘cultural mediators’ to deliver a program in various ways –mainly education sessions<br><br>Content – use of popular proverbs<br><br>Settings- sessions were delivered mainly in Ethiopian community settings (inferred) | +++                                            | +++                                             | +++                                          | +++                                           | ++                                             | X                                             | +                                         |
| <b>Choi (1996) San Francisco, USA</b> | Single group session with a focus on sexual risk reduction for immigrant and ethnic minority gay and bisexual men                                                                                           | Content – exploration of positive ethnic and sexual identities<br><br>Gender and sexuality - of co-facilitator of group                                                                                                                                                                              | +++                                            | ++                                              | +++                                          | +                                             | ++                                             | X                                             | X                                         |

| First Author & Location       | Intervention                                                                                                                                                                                                                        | Adaptation of intervention activities to increase cultural appropriateness                                                                                                                                                                                                                                                      | Mechanisms of adaptation 'authenticity' | Mechanisms of adaptation 'understanding' | Mechanisms of adaptation 'consonance' | Mechanisms of adaptation 'specificity' | Mechanisms of adaptation 'embeddedness' | Mechanisms of adaptation 'endorsement' | Mechanisms of adaptation 'framing' |
|-------------------------------|-------------------------------------------------------------------------------------------------------------------------------------------------------------------------------------------------------------------------------------|---------------------------------------------------------------------------------------------------------------------------------------------------------------------------------------------------------------------------------------------------------------------------------------------------------------------------------|-----------------------------------------|------------------------------------------|---------------------------------------|----------------------------------------|-----------------------------------------|----------------------------------------|------------------------------------|
| Conner (2004) California, USA | Case studies of evaluation of two interventions                                                                                                                                                                                     | 1. Language (Spanish)<br><br>Content – developed a low-literacy comic book ( <i>fotonovela</i> )                                                                                                                                                                                                                                | 1. +++                                  | 1. +++                                   | 1. +++                                | 1. +++                                 | 1. ++                                   | 1. +++                                 | 1. +++                             |
|                               | 1. Tres Hombres sin Fronteras – a health promotion resource with a focus on sexual risk reduction for immigrant farmworkers<br><br>2. SOLAAR - retreat for small groups with a focus on sexual risk reduction for immigrant gay men | 2. Language (Spanish)<br><br>Bilingual Community Educators (BCEs) – deliver the retreat program<br><br>Gender and sexuality<br><br>Content- primary goal of retreat is 'clashing cultural norms' of immigrant cultures and urban American culture<br><br>Partnership/capacity building - between researchers and CBO (inferred) | 2. +++                                  | 2. +++                                   | 2. +++                                | 2. ++                                  | 2. +++                                  | 2. ++                                  | 2. +++                             |

| First Author & Location          | Intervention                                                                                                                                                                                          | Adaptation of intervention activities to increase cultural appropriateness                                                                                                                                                                                                                                                                                                                                                                    | Mechanisms of adaptation 'authenticity' | Mechanisms of adaptation 'understanding' | Mechanisms of adaptation 'consonance' | Mechanisms of adaptation 'specificity' | Mechanisms of adaptation 'embeddedness' | Mechanisms of adaptation 'endorsement' | Mechanisms of adaptation 'framing' |
|----------------------------------|-------------------------------------------------------------------------------------------------------------------------------------------------------------------------------------------------------|-----------------------------------------------------------------------------------------------------------------------------------------------------------------------------------------------------------------------------------------------------------------------------------------------------------------------------------------------------------------------------------------------------------------------------------------------|-----------------------------------------|------------------------------------------|---------------------------------------|----------------------------------------|-----------------------------------------|----------------------------------------|------------------------------------|
| Conner (2005)<br>California, USA | SOLAAR retreat for small groups with a focus on sexual risk reduction for immigrant gay men<br><br>Social Marketing<br><br>Various other activities including outreach and health promotion resources | Language (Spanish)<br><br>Bilingual Community Educators (BCEs) – deliver the retreat program<br><br>Gender and sexuality<br><br>Content – primary goal of retreat program is 'clashing cultural norms' of immigrant cultures of participants and urban American culture<br><br>Settings-advertising retreats Latino gay and bisexual publications in California<br><br>Partnership/capacity building - between research organisation and CBOs | +++                                     | +++                                      | +++                                   | +++                                    | +++                                     | ++                                     | +++                                |

| <b>First Author &amp; Location</b>    | <b>Intervention</b>                                                                                                                                                                                                                                                        | <b>Adaptation of intervention activities to increase cultural appropriateness</b>                                                                                                                                                                                                                                                                                   | <b>Mechanisms of adaptation 'authenticity'</b> | <b>Mechanisms of adaptation 'understanding'</b> | <b>Mechanisms of adaptation 'consonance'</b> | <b>Mechanisms of adaptation 'specificity'</b> | <b>Mechanisms of adaptation 'embeddedness'</b> | <b>Mechanisms of adaptation 'endorsement'</b> | <b>Mechanisms of adaptation 'framing'</b> |
|---------------------------------------|----------------------------------------------------------------------------------------------------------------------------------------------------------------------------------------------------------------------------------------------------------------------------|---------------------------------------------------------------------------------------------------------------------------------------------------------------------------------------------------------------------------------------------------------------------------------------------------------------------------------------------------------------------|------------------------------------------------|-------------------------------------------------|----------------------------------------------|-----------------------------------------------|------------------------------------------------|-----------------------------------------------|-------------------------------------------|
| <b>Darrow (2004)<br/>Florida, USA</b> | Reach 2010- Four key activities to raise awareness (not reported in detail)- outreach to residents and community leaders, mass media, Capacity building of CBOs using Abstinence, be Faithful, use Condoms (ABC) prevention messages with a focus on sexual risk reduction | Settings-targeting interventions to multiethnic Black and Hispanic neighbourhoods/communities informed by ethnographic assessments<br><br>Partnership/capacity building - between research organisation and three CBOs<br><br>Languages (Spanish and Creole) (inferred)<br><br>Content-focus groups & surveys with community groups to inform Community Action Plan | +                                              | +++                                             | +++                                          | +                                             | +++                                            | +++                                           | +++                                       |

| First Author & Location        | Intervention                                                                                                                                                                                                                                                   | Adaptation of intervention activities to increase cultural appropriateness                                                                                                                                                                                                                                                                                           | Mechanisms of adaptation 'authenticity' | Mechanisms of adaptation 'understanding' | Mechanisms of adaptation 'consonance' | Mechanisms of adaptation 'specificity' | Mechanisms of adaptation 'embeddedness' | Mechanisms of adaptation 'endorsement' | Mechanisms of adaptation 'framing' |
|--------------------------------|----------------------------------------------------------------------------------------------------------------------------------------------------------------------------------------------------------------------------------------------------------------|----------------------------------------------------------------------------------------------------------------------------------------------------------------------------------------------------------------------------------------------------------------------------------------------------------------------------------------------------------------------|-----------------------------------------|------------------------------------------|---------------------------------------|----------------------------------------|-----------------------------------------|----------------------------------------|------------------------------------|
| Diaz (1998) San Francisco, USA | <p>Hermanos de Luna Y Sol, a range of activities to recruit gay and bisexual immigrant men – with an emphasis on low-income, monolingual, unacculturated men- into small group education and peer support activities with a focus on sexual risk reduction</p> | <p>Bilingual Community Educators (BCEs) – to facilitate group activities</p> <p>Language (Spanish)</p> <p>Gender and sexuality – of group facilitators</p> <p>Content – incorporated dominant Latino cultural values on homosexuality in development of content</p> <p>Settings-outreach and advertising to Latino gay and bisexual bars to recruit participants</p> | +++                                     | +++                                      | +++                                   | ++                                     | +++                                     | ++                                     | ++                                 |

| First Author & Location              | Intervention                                                                                                                                                     | Adaptation of intervention activities to increase cultural appropriateness                                                                                                                                                                                                                                                                                                                     | Mechanisms of adaptation 'authenticity' | Mechanisms of adaptation 'understanding' | Mechanisms of adaptation 'consonance' | Mechanisms of adaptation 'specificity' | Mechanisms of adaptation 'embeddedness' | Mechanisms of adaptation 'endorsement' | Mechanisms of adaptation 'framing' |
|--------------------------------------|------------------------------------------------------------------------------------------------------------------------------------------------------------------|------------------------------------------------------------------------------------------------------------------------------------------------------------------------------------------------------------------------------------------------------------------------------------------------------------------------------------------------------------------------------------------------|-----------------------------------------|------------------------------------------|---------------------------------------|----------------------------------------|-----------------------------------------|----------------------------------------|------------------------------------|
| Flaskerud (1988)<br>Los Angeles, USA | 12-minute slide show with supporting health promotion resources with a focus HIV knowledge, attitudes and sexual risk reduction for immigrants (mainly refugees) | Language (Vietnamese)<br><br>Bilingual Community Educators (BCEs) – Vietnamese educators<br><br>Gender<br><br>Content- developed taking into account Vietnamese cultural values , used Vietnamese imagery and characters<br><br>Settings-interventions delivered at a CBO targeting Indochinese refugees<br><br>Partnership/capacity building - between research organisation and refugee CBOs | +++                                     | +++                                      | +++                                   | +++                                    | +++                                     | X                                      | +                                  |

| First Author & Location              | Intervention                                                                                                                                                                                                                                 | Adaptation of intervention activities to increase cultural appropriateness                                                                                                                                                                                                                                                                                                                                    | Mechanisms of adaptation 'authenticity' | Mechanisms of adaptation 'understanding' | Mechanisms of adaptation 'consonance' | Mechanisms of adaptation 'specificity' | Mechanisms of adaptation 'embeddedness' | Mechanisms of adaptation 'endorsement' | Mechanisms of adaptation 'framing' |
|--------------------------------------|----------------------------------------------------------------------------------------------------------------------------------------------------------------------------------------------------------------------------------------------|---------------------------------------------------------------------------------------------------------------------------------------------------------------------------------------------------------------------------------------------------------------------------------------------------------------------------------------------------------------------------------------------------------------|-----------------------------------------|------------------------------------------|---------------------------------------|----------------------------------------|-----------------------------------------|----------------------------------------|------------------------------------|
| Flaskerud (2000)<br>Los Angeles, USA | Various activities including - 1-1 counselling, group discussion, Spanish-language health promotion print and audio-visual resources - to reduce sexual and injecting drug use risks (not reported in detail) for low-income immigrant women | Language(Spanish )<br><br>Bilingual Community Educators (BCEs) – of health care workers who delivered the intervention in a women and children’s health centre<br><br>Gender - of health care workers<br><br>Content- developed taking into account cultural values from focus groups and community consultations<br><br>Partnership/capacity building - between research organisation and women’s health CBO | +++                                     | ++                                       | +++                                   | +++                                    | +++                                     | +++                                    | +++                                |



| <b>First Author &amp; Location</b>           | <b>Intervention</b>                                                                                                                                                                                                                          | <b>Adaptation of intervention activities to increase cultural appropriateness</b>                                                                                                                                                          | <b>Mechanisms of adaptation 'authenticity'</b> | <b>Mechanisms of adaptation 'understanding'</b> | <b>Mechanisms of adaptation 'consonance'</b> | <b>Mechanisms of adaptation 'specificity'</b> | <b>Mechanisms of adaptation 'embeddedness'</b> | <b>Mechanisms of adaptation 'endorsement'</b> | <b>Mechanisms of adaptation 'framing'</b> |
|----------------------------------------------|----------------------------------------------------------------------------------------------------------------------------------------------------------------------------------------------------------------------------------------------|--------------------------------------------------------------------------------------------------------------------------------------------------------------------------------------------------------------------------------------------|------------------------------------------------|-------------------------------------------------|----------------------------------------------|-----------------------------------------------|------------------------------------------------|-----------------------------------------------|-------------------------------------------|
| <b>Flaskerud (1997)<br/>Los Angeles, USA</b> | Various activities including - 1-1 counselling, group discussion, Spanish-language health promotion print and audio-visual resources - to reduce sexual and injecting drug use risks (not reported in detail) for low-income immigrant women | Language(Spanish )<br><br>Bilingual Community Educators (BCEs) – of health care workers who delivered the intervention in a women and children’s health centre<br><br>Gender<br><br>Content- developed taking into account cultural values | +++                                            | ++                                              | +++                                          | +++                                           | +++                                            | ++                                            | +++                                       |

| First Author & Location        | Intervention                                                                                                                                                                                                                                                                                                                         | Adaptation of intervention activities to increase cultural appropriateness                                                                                                                                                                                                                                                                              | Mechanisms of adaptation 'authenticity' | Mechanisms of adaptation 'understanding' | Mechanisms of adaptation 'consonance' | Mechanisms of adaptation 'specificity' | Mechanisms of adaptation 'embeddedness' | Mechanisms of adaptation 'endorsement' | Mechanisms of adaptation 'framing' |
|--------------------------------|--------------------------------------------------------------------------------------------------------------------------------------------------------------------------------------------------------------------------------------------------------------------------------------------------------------------------------------|---------------------------------------------------------------------------------------------------------------------------------------------------------------------------------------------------------------------------------------------------------------------------------------------------------------------------------------------------------|-----------------------------------------|------------------------------------------|---------------------------------------|----------------------------------------|-----------------------------------------|----------------------------------------|------------------------------------|
| Gomez (1999) San Francisco USA | Mujeres Unidas y Activas (MUA) - an intervention which aims to empower immigrant and refugee women and to assess effect on sexual risk reduction<br><br>MUA activities include support groups, workshops, HIV workshops and leadership training.<br><br>Participants at 6 months follow-up had attended a median of 9 MUA activities | Language(Spanish )<br><br>Bilingual Community Educators (BCEs) – of health care workers who delivered the intervention activities in a Latina CBO<br><br>Gender - of health care workers<br><br>Content- developed taking into account cultural values (inferred)<br><br>Partnership & capacity building - between research organisation and Latina CBO | +++                                     | +++                                      | +++                                   | +++                                    | +++                                     | +++                                    | +++                                |

| First Author & Location            | Intervention                                                                                                                                                                                                                    | Adaptation of intervention activities to increase cultural appropriateness                                                                                                                                                                                                                                      | Mechanisms of adaptation 'authenticity' | Mechanisms of adaptation 'understanding' | Mechanisms of adaptation 'consonance' | Mechanisms of adaptation 'specificity' | Mechanisms of adaptation 'embeddedness' | Mechanisms of adaptation 'endorsement' | Mechanisms of adaptation 'framing' |
|------------------------------------|---------------------------------------------------------------------------------------------------------------------------------------------------------------------------------------------------------------------------------|-----------------------------------------------------------------------------------------------------------------------------------------------------------------------------------------------------------------------------------------------------------------------------------------------------------------|-----------------------------------------|------------------------------------------|---------------------------------------|----------------------------------------|-----------------------------------------|----------------------------------------|------------------------------------|
| Haour-Knipe (1999) Switzerland and | Swiss Migrants Project – reporting on exploratory studies, process evaluation and outcome evaluations of three phases of the project                                                                                            | Languages (Spanish, Portuguese and Turkish )<br><br>Bilingual Community Educators (BCEs) – Community Co-ordinators with teams of peer educators 'mediators'                                                                                                                                                     | +++                                     | +++                                      | +++                                   | +++                                    | +++                                     | +++                                    | +++                                |
|                                    | Various activities delivered – information dissemination to immigrant communities, HIV workshops, development of health promotion print and audio-visual resources, use of immigrant mass media, and some 1-1 support for PLWHA | Content - developed taking into account cultural values from exploratory needs analysis and community consultations<br><br>Settings-delivering interventions via existing structures in the three communities<br><br>Partnership/capacity building – of community 'mediators' and existing community structures |                                         |                                          |                                       |                                        |                                         |                                        |                                    |

| First Author & Location    | Intervention                                                                                                                                                                                                                                     | Adaptation of intervention activities to increase cultural appropriateness                                                                                                                                                         | Mechanisms of adaptation 'authenticity' | Mechanisms of adaptation 'understanding' | Mechanisms of adaptation 'consonance' | Mechanisms of adaptation 'specificity' | Mechanisms of adaptation 'embeddedness' | Mechanisms of adaptation 'endorsement' | Mechanisms of adaptation 'framing' |
|----------------------------|--------------------------------------------------------------------------------------------------------------------------------------------------------------------------------------------------------------------------------------------------|------------------------------------------------------------------------------------------------------------------------------------------------------------------------------------------------------------------------------------|-----------------------------------------|------------------------------------------|---------------------------------------|----------------------------------------|-----------------------------------------|----------------------------------------|------------------------------------|
| Hlaing (2006) Florida, USA | Evaluation of Reach 2010- Four key activities to raise awareness - outreach to residents and community leaders, mass media, capacity building of CBOs, using Abstinence, be Faithful, use Condoms prevention messages in a multiethnic community | Settings-targeting interventions to multiethnic neighbourhoods/communities<br><br>Partnership/capacity building - between research organisation and three CBOs<br><br>Language (Spanish and Creole)- in health promotion resources | +                                       | ++                                       | X                                     | +                                      | ++                                      | X                                      | +                                  |

| First Author & Location       | Intervention                                                                               | Adaptation of intervention activities to increase cultural appropriateness                                                                                                                                                                                                                                                                                      | Mechanisms of adaptation 'authenticity' | Mechanisms of adaptation 'understanding' | Mechanisms of adaptation 'consonance' | Mechanisms of adaptation 'specificity' | Mechanisms of adaptation 'embeddedness' | Mechanisms of adaptation 'endorsement' | Mechanisms of adaptation 'framing' |
|-------------------------------|--------------------------------------------------------------------------------------------|-----------------------------------------------------------------------------------------------------------------------------------------------------------------------------------------------------------------------------------------------------------------------------------------------------------------------------------------------------------------|-----------------------------------------|------------------------------------------|---------------------------------------|----------------------------------------|-----------------------------------------|----------------------------------------|------------------------------------|
| Hovey (2007)<br>Michigan, USA | <i>Informate</i> theatrical presentation to young immigrants in 7 migrant farmworker camps | Language (Spanish)<br><br>Bilingual Community Educators (BCEs) – male and female young theatre players were from the target groups and called 'Teen Health Aides' (THAa)<br><br>Content- THAs developed the script taking into account cultural values<br><br>Settings-delivered theatrical presentation at 7 farmworker migrant camps to enhance accessibility | +++                                     | +++                                      | ++                                    | +++                                    | +++                                     | ++                                     | X                                  |

| <b>First Author &amp; Location</b>   | <b>Intervention</b>                                                                                 | <b>Adaptation of intervention activities to increase cultural appropriateness</b>                                                                                                               | <b>Mechanisms of adaptation ‘authenticity’</b> | <b>Mechanisms of adaptation ‘understanding’</b> | <b>Mechanisms of adaptation ‘consonance’</b> | <b>Mechanisms of adaptation ‘specificity’</b> | <b>Mechanisms of adaptation ‘embeddedness’</b> | <b>Mechanisms of adaptation ‘endorsement’</b> | <b>Mechanisms of adaptation ‘framing’</b> |
|--------------------------------------|-----------------------------------------------------------------------------------------------------|-------------------------------------------------------------------------------------------------------------------------------------------------------------------------------------------------|------------------------------------------------|-------------------------------------------------|----------------------------------------------|-----------------------------------------------|------------------------------------------------|-----------------------------------------------|-------------------------------------------|
| <b>Kim (2006) Chicago, USA</b>       | Project SEPA, 6 group sessions with a focus on sexual risk reduction for low-income immigrant women | Language(Spanish )<br>Bilingual Community Educators (BCEs) – group facilitators<br>Gender - of facilitators                                                                                     | +++                                            | +++                                             | +++                                          | ++                                            | ++                                             | X                                             | X                                         |
|                                      | Study examined intervention participants compared to dropouts to assess predictors of participation | Content - of education sessions (inferred)<br>Settings - variety of methods to recruit participants including Spanish-language media                                                            |                                                |                                                 |                                              |                                               |                                                |                                               |                                           |
| <b>Kocken (2001) The Netherlands</b> | Single education session for male immigrants with a focus on HIV prevention and condom use          | Language (Turkish and Arabic)<br>Bilingual Community Educators (BCEs) – ‘lay health advisors’<br>Gender - of ‘lay health advisors’<br>Settings- cafes and mosques to deliver education sessions | +++                                            | +++                                             | ++                                           | +++                                           | +++                                            | X                                             | +++                                       |
|                                      |                                                                                                     |                                                                                                                                                                                                 |                                                |                                                 |                                              |                                               |                                                |                                               |                                           |

| First Author & Location       | Intervention                                                                                                               | Adaptation of intervention activities to increase cultural appropriateness                                                                                                                                                                                                                                                                                      | Mechanisms of adaptation 'authenticity' | Mechanisms of adaptation 'understanding' | Mechanisms of adaptation 'consonance' | Mechanisms of adaptation 'specificity' | Mechanisms of adaptation 'embeddedness' | Mechanisms of adaptation 'endorsement' | Mechanisms of adaptation 'framing' |
|-------------------------------|----------------------------------------------------------------------------------------------------------------------------|-----------------------------------------------------------------------------------------------------------------------------------------------------------------------------------------------------------------------------------------------------------------------------------------------------------------------------------------------------------------|-----------------------------------------|------------------------------------------|---------------------------------------|----------------------------------------|-----------------------------------------|----------------------------------------|------------------------------------|
| Loue (1996)<br>San Diego, USA | Establishment of a prevention program and organization to address HIV/AIDS among Asian and Pacific Islanders- Project HAPI | <p>Content of HIV prevention program developed taking into account cultural values from qualitative and quantitative needs analysis</p> <p>Settings-use of 'gatekeepers' to access Asian and Pacific Islander communities</p> <p>Partnership/capacity building – of a range community agencies in working groups, program planning and 'political' meetings</p> | +++                                     | +++                                      | +++                                   | +                                      | +++                                     | +++                                    | +                                  |

| First Author & Location | Intervention                                                                                                                                                      | Adaptation of intervention activities to increase cultural appropriateness                                                                                                                                                 | Mechanisms of adaptation 'authenticity' | Mechanisms of adaptation 'understanding' | Mechanisms of adaptation 'consonance' | Mechanisms of adaptation 'specificity' | Mechanisms of adaptation 'embeddedness' | Mechanisms of adaptation 'endorsement' | Mechanisms of adaptation 'framing' |
|-------------------------|-------------------------------------------------------------------------------------------------------------------------------------------------------------------|----------------------------------------------------------------------------------------------------------------------------------------------------------------------------------------------------------------------------|-----------------------------------------|------------------------------------------|---------------------------------------|----------------------------------------|-----------------------------------------|----------------------------------------|------------------------------------|
| Marahaj (1999)<br>UK    | Assessment of a range of HIV prevention interventions with refugees and asylum seekers. Four summary case studies of interventions at group and community levels: | <ul style="list-style-type: none"> <li>1. African Communities HIV Project</li> </ul>                                                                                                                                       | 1. +                                    | 1. +                                     | 1. +                                  | 1. ++                                  | 1. +++                                  | 1. +++                                 | 1. X                               |
|                         | 1. African Communities HIV Project (ACHP)                                                                                                                         | <ul style="list-style-type: none"> <li>Partnership/capacity building – building alliances to create co-ordinated HIV prevention activities with African communities</li> <li>2. African Health Football Project</li> </ul> | 2. +++                                  | 2. +                                     | 2. +++                                | 2. +++                                 | 2. +++                                  | 2. +++                                 | 2. ++                              |
|                         | 2. African Health Football Project                                                                                                                                | Settings -integrated HIV health promotion into an African soccer tournament                                                                                                                                                |                                         |                                          |                                       |                                        |                                         |                                        |                                    |
|                         |                                                                                                                                                                   | Bilingual Community Educators (BCEs) – volunteer peer educators from 'Black' HIV services were used to distribute HIV information and staff the intervention                                                               |                                         |                                          |                                       |                                        |                                         |                                        |                                    |
|                         |                                                                                                                                                                   | Partnership/capacity building –tournament players and managers                                                                                                                                                             |                                         |                                          |                                       |                                        |                                         |                                        |                                    |



3. Ugandan  
AIDS Action  
Play

and 'Black'  
volunteers planned  
the intervention

- 3. Ugandan  
AIDS Action  
Play

Bilingual Community  
Educators (BCEs) –  
commissioned a  
Ugandan theatre  
group to develop a  
HIV/AIDS play

3. +++

3. +

3. +++

3. +++

3. +++

3. +++

3. +++

Content –  
commissioned a  
Ugandan theatre  
group to develop a  
play around  
HIV/AIDS

Settings- used a  
culturally appropriate  
and popular medium  
of communication to  
discuss HIV/AIDS  
and a variety of  
community settings  
to deliver education  
sessions and perform  
the play

|                                                    |                                                                                                                              |      |      |      |      |      |      |      |      |      |
|----------------------------------------------------|------------------------------------------------------------------------------------------------------------------------------|------|------|------|------|------|------|------|------|------|
| 4. Refugee Council's HIV and AIDS Development Work | <ul style="list-style-type: none"> <li>4. Refugee Council's HIV and AIDS Development Work</li> </ul>                         | 4. + | 4. + | 4. + | 4. X | 4. + | 4. X | 4. X | 4. X | 4. X |
|                                                    | Language – HIV prevention resources in 8 languages                                                                           |      |      |      |      |      |      |      |      |      |
|                                                    | Content – of training for HIV and refugee service providers reflected HIV <u>and</u> refugee issues                          |      |      |      |      |      |      |      |      |      |
|                                                    | Partnership/capacity building - support to refugee service providers for HIV work, linking refugee and HIV service providers |      |      |      |      |      |      |      |      |      |

| <b>First Author &amp; Location</b>               | <b>Intervention</b>                                                                                  | <b>Adaptation of intervention activities to increase cultural appropriateness</b>                                                                                                  | <b>Mechanisms of adaptation ‘authenticity’</b> | <b>Mechanisms of adaptation ‘understanding’</b> | <b>Mechanisms of adaptation ‘consonance’</b> | <b>Mechanisms of adaptation ‘specificity’</b> | <b>Mechanisms of adaptation ‘embeddedness’</b> | <b>Mechanisms of adaptation ‘endorsement’</b> | <b>Mechanisms of adaptation ‘framing’</b> |
|--------------------------------------------------|------------------------------------------------------------------------------------------------------|------------------------------------------------------------------------------------------------------------------------------------------------------------------------------------|------------------------------------------------|-------------------------------------------------|----------------------------------------------|-----------------------------------------------|------------------------------------------------|-----------------------------------------------|-------------------------------------------|
| <b>Martijn (2004) Rotterdam, The Netherlands</b> | Two studies of a single education session for male immigrants focus on HIV prevention and condom use | Language (Turkish and Arabic)                                                                                                                                                      | 1. +++                                         | 1. +++                                          | 1. ++                                        | 1. ++                                         | 1. +                                           | 1. X                                          | 1. X                                      |
|                                                  | Study 1 – delivered by ‘lay health advisors’                                                         | Bilingual Community Educators (BCEs) – ‘lay health advisors’ in both studies. Interpreter was used in Study 2 with ‘professional health advisor’                                   | 2. ++                                          | 2. ++                                           | 2. +                                         | 2. ++                                         | 2. +                                           | 2. X                                          | 2. X                                      |
|                                                  | Study 2- delivered by ‘lay health advisors’ and ‘professional health advisors’ (with an interpreter) | Gender - ‘lay health advisors’ & ‘professional health advisors’<br>Settings-used two settings. Study 1 at a Newcomer Integration Project and Study 2 at a refugee reception centre |                                                |                                                 |                                              |                                               |                                                |                                               |                                           |

| <b>First Author &amp; Location</b>         | <b>Intervention</b>                                                                                                                                                    | <b>Adaptation of intervention activities to increase cultural appropriateness</b>                                                                                                                                                                          | <b>Mechanisms of adaptation ‘authenticity’</b> | <b>Mechanisms of adaptation ‘understanding’</b> | <b>Mechanisms of adaptation ‘consonance’</b> | <b>Mechanisms of adaptation ‘specificity’</b> | <b>Mechanisms of adaptation ‘embeddedness’</b> | <b>Mechanisms of adaptation ‘endorsement’</b> | <b>Mechanisms of adaptation ‘framing’</b> |
|--------------------------------------------|------------------------------------------------------------------------------------------------------------------------------------------------------------------------|------------------------------------------------------------------------------------------------------------------------------------------------------------------------------------------------------------------------------------------------------------|------------------------------------------------|-------------------------------------------------|----------------------------------------------|-----------------------------------------------|------------------------------------------------|-----------------------------------------------|-------------------------------------------|
| <b>Martin (2005)<br/>Chicago, USA</b>      | Centro San Bonifacio HIV Prevention Program Education sessions carried out in the community for male and female immigrants with a focus on HIV knowledge and awareness | Language (Spanish)<br><br>Bilingual Community Educators (BCEs) – ‘promotoras’ were used to recruit and deliver education sessions<br><br>Settings-used a variety of settings to deliver education session including people’s homes, schools, Church groups | +++                                            | +++                                             | +                                            | ++                                            | +++                                            | X                                             | +                                         |
| <b>Maxwell (2002)<br/>Los Angeles, USA</b> | Single education session to young immigrant attendees at a HIV clinic with a focus on condom use and sexual negotiation                                                | Language (Spanish)                                                                                                                                                                                                                                         | +                                              | +                                               | X                                            | X                                             | X                                              | X                                             | X                                         |

| First Author & Location                          | Intervention                                                                                                                                                                | Adaptation of intervention activities to increase cultural appropriateness                                                                                                                                                                                               | Mechanisms of adaptation 'authenticity' | Mechanisms of adaptation 'understanding' | Mechanisms of adaptation 'consonance' | Mechanisms of adaptation 'specificity' | Mechanisms of adaptation 'embeddedness' | Mechanisms of adaptation 'endorsement' | Mechanisms of adaptation 'framing' |
|--------------------------------------------------|-----------------------------------------------------------------------------------------------------------------------------------------------------------------------------|--------------------------------------------------------------------------------------------------------------------------------------------------------------------------------------------------------------------------------------------------------------------------|-----------------------------------------|------------------------------------------|---------------------------------------|----------------------------------------|-----------------------------------------|----------------------------------------|------------------------------------|
| Mc Mahon (2005)<br>Sydney & Melbourne, Australia | Pilot ethnic media advertising and publicity campaign targeting immigrants to promote HIV testing and access to treatment and care by PLWHA at public sexual health clinics | Language(multiple)<br>Bilingual Community Educators (BCEs) – as media spokespeople on radio (inferred)<br>Content – campaign themes generated from a needs assessment, refined with focus groups<br>Settings-advertising and publicity used media accessed by immigrants | +++                                     | +++                                      | ++                                    | +                                      | +++                                     | +                                      | X                                  |
| Mishra (1996)<br>California, USA                 | Tres Hombres sin Fronteras – two health promotion resources with a focus on sexual risk reduction for immigrant male farmworkers                                            | Language (Spanish)<br>Content – developed a low-literacy comic book ( <i>fotonovela</i> ) and low-health literacy radio segments ( <i>radionovela</i> )<br>Settings-outreach to farm camps to distribute resources                                                       | ++                                      | +++                                      | ++                                    | +++                                    | +++                                     | +                                      | +                                  |

| <b>First Author &amp; Location</b>               | <b>Intervention</b>                                                                                                                                                                                                           | <b>Adaptation of intervention activities to increase cultural appropriateness</b>                                                                                                                                                                                                                                                                | <b>Mechanisms of adaptation ‘authenticity’</b> | <b>Mechanisms of adaptation ‘understanding’</b> | <b>Mechanisms of adaptation ‘consonance’</b> | <b>Mechanisms of adaptation ‘specificity’</b> | <b>Mechanisms of adaptation ‘embeddedness’</b> | <b>Mechanisms of adaptation ‘endorsement’</b> | <b>Mechanisms of adaptation ‘framing’</b> |
|--------------------------------------------------|-------------------------------------------------------------------------------------------------------------------------------------------------------------------------------------------------------------------------------|--------------------------------------------------------------------------------------------------------------------------------------------------------------------------------------------------------------------------------------------------------------------------------------------------------------------------------------------------|------------------------------------------------|-------------------------------------------------|----------------------------------------------|-----------------------------------------------|------------------------------------------------|-----------------------------------------------|-------------------------------------------|
| <b>Nakyonyi (1993)</b><br><b>Toronto, Canada</b> | Africans United to Control AIDS (AUCA)<br><br>Various activities described including information dissemination to African immigrants, HIV workshops, outreach to African community organisations, use of immigrant mass media | Languages (multiple)<br><br>Bilingual Community Educators (BCEs) – African volunteers recruited and trained as community educators/outreach workers<br><br>Content – activities are developed in partnership with community groups (inferred)<br><br>Settings-use of community events and venues and use of media accessed by African immigrants | +++                                            | ++                                              | ++                                           | ++                                            | +++                                            | +++                                           | ++                                        |

| First Author & Location                     | Intervention                                                                                                                                | Adaptation of intervention activities to increase cultural appropriateness                                                                                                                                                                                                | Mechanisms of adaptation 'authenticity' | Mechanisms of adaptation 'understanding' | Mechanisms of adaptation 'consonance' | Mechanisms of adaptation 'specificity' | Mechanisms of adaptation 'embeddedness' | Mechanisms of adaptation 'endorsement' | Mechanisms of adaptation 'framing' |
|---------------------------------------------|---------------------------------------------------------------------------------------------------------------------------------------------|---------------------------------------------------------------------------------------------------------------------------------------------------------------------------------------------------------------------------------------------------------------------------|-----------------------------------------|------------------------------------------|---------------------------------------|----------------------------------------|-----------------------------------------|----------------------------------------|------------------------------------|
| Organista (2006)<br>Mexico border area, USA | Two pilot education sessions for Latino Migrant Day with a focus on sexual risk reduction, condom use and reduced alcohol and substance use | Language (inferred) (Spanish )<br><br>Content- of education sessions developed from formative quant and qual research, use of <i>Lotteria</i> cards, <i>fotonovelas</i> , comic-style books, and <i>radionovelas</i>                                                      | ++                                      | ++                                       | +++                                   | ++                                     | ++                                      | +                                      | ++                                 |
| Peragallo (2005)<br>Chicago, USA            | Project SEPA, 6 group sessions with a focus on sexual risk reduction for low-income immigrant women                                         | Language (Spanish)<br><br>Bilingual Community Educators (BCEs) – group facilitators<br><br>Gender - of group facilitators<br><br>Content- of education sessions (inferred)<br><br>Settings- a variety of methods to recruit participants including Spanish-language media | +++                                     | +++                                      | ++                                    | +++                                    | +++                                     | X                                      | +                                  |

| <b>First Author &amp; Location</b> | <b>Intervention</b>                                                                                                                                              | <b>Adaptation of intervention activities to increase cultural appropriateness</b>                                                                 | <b>Mechanisms of adaptation 'authenticity'</b> | <b>Mechanisms of adaptation 'understanding'</b> | <b>Mechanisms of adaptation 'consonance'</b> | <b>Mechanisms of adaptation 'specificity'</b> | <b>Mechanisms of adaptation 'embeddedness'</b> | <b>Mechanisms of adaptation 'endorsement'</b> | <b>Mechanisms of adaptation 'framing'</b> |
|------------------------------------|------------------------------------------------------------------------------------------------------------------------------------------------------------------|---------------------------------------------------------------------------------------------------------------------------------------------------|------------------------------------------------|-------------------------------------------------|----------------------------------------------|-----------------------------------------------|------------------------------------------------|-----------------------------------------------|-------------------------------------------|
| <b>Raj (2001)<br/>Boston, USA</b>  | Comparison of two interventions to reach low-income immigrant women:<br>1. HIV-specific with participatory education;<br>2. women's health specific and didactic | Language (Spanish)                                                                                                                                | 1. +++                                         | 1. +++                                          | 1. +++                                       | 1. ++                                         | 1. ++                                          | 1. X                                          | 1. X                                      |
|                                    |                                                                                                                                                                  | Bilingual Community Educators (BCEs) – to facilitate groups<br><br>Content- of education sessions (inferred)<br><br>Gender - of group facilitator | 2. +++                                         | 2. +++                                          | 2. +++                                       | 2. ++                                         | 2. +                                           | 2. X                                          | 2. X                                      |
|                                    | Each intervention<br>12 group sessions & 16 hours of content- with a focus on sexual risk reduction                                                              |                                                                                                                                                   |                                                |                                                 |                                              |                                               |                                                |                                               |                                           |



| First Author & Location       | Intervention                                                                                                                 | Adaptation of intervention activities to increase cultural appropriateness                                                                                                                                                                                                                                                                                                         | Mechanisms of adaptation 'authenticity' | Mechanisms of adaptation 'understanding' | Mechanisms of adaptation 'consonance' | Mechanisms of adaptation 'specificity' | Mechanisms of adaptation 'embeddedness' | Mechanisms of adaptation 'endorsement' | Mechanisms of adaptation 'framing' |
|-------------------------------|------------------------------------------------------------------------------------------------------------------------------|------------------------------------------------------------------------------------------------------------------------------------------------------------------------------------------------------------------------------------------------------------------------------------------------------------------------------------------------------------------------------------|-----------------------------------------|------------------------------------------|---------------------------------------|----------------------------------------|-----------------------------------------|----------------------------------------|------------------------------------|
| Shtarksh all (2000)<br>Israel | Overview of model for the development of HIV/AIDS programs for immigrants using two programs for immigrants as case studies: | Model proposes an iterative approach to program development including considering: 'old country' and 'new country' values; the cultural transitions inherent in immigration; employing immigrants as 'cultural insighters'; harnessing leadership from the immigrant community; developing culturally specific messages; workforce development of host country health care workers |                                         |                                          |                                       |                                        |                                         |                                        |                                    |
|                               | 1. Immigrant youth from the former Soviet Union and Ethiopia                                                                 |                                                                                                                                                                                                                                                                                                                                                                                    | 1. +                                    | 1. X                                     | 1. ++                                 | 1. +                                   | 1. X                                    | 1. X                                   | 1. ++                              |
|                               | 2. Ethiopian immigrants                                                                                                      |                                                                                                                                                                                                                                                                                                                                                                                    | 2. +++                                  | 2. +++                                   | 2. +++                                | 2. +++                                 | 2. X                                    | 2. X                                   | 2. ++                              |

| First Author & Location                        | Intervention                                                                                       | Adaptation of intervention activities to increase cultural appropriateness                                                                                                                                                                                                                                                                                                                                                                                                                                                                                                                                  | Mechanisms of adaptation 'authenticity' | Mechanisms of adaptation 'understanding' | Mechanisms of adaptation 'consonance' | Mechanisms of adaptation 'specificity' | Mechanisms of adaptation 'embeddedness' | Mechanisms of adaptation 'endorsement' | Mechanisms of adaptation 'framing' |
|------------------------------------------------|----------------------------------------------------------------------------------------------------|-------------------------------------------------------------------------------------------------------------------------------------------------------------------------------------------------------------------------------------------------------------------------------------------------------------------------------------------------------------------------------------------------------------------------------------------------------------------------------------------------------------------------------------------------------------------------------------------------------------|-----------------------------------------|------------------------------------------|---------------------------------------|----------------------------------------|-----------------------------------------|----------------------------------------|------------------------------------|
| Somerville (2006)<br>California and Texas, USA | Training popular opinion leaders to carry out HIV outreach among migrant men who have sex with men | <p>Popular Opinion Leader intervention adapted after needs analysis</p> <p>Language (Spanish) – of training and evaluation material</p> <p>Bilingual Community Educators (BCEs) – YPLs outreach</p> <p>Gender - of YPLs</p> <p>Content – of YPL training adapted to:</p> <ul style="list-style-type: none"> <li>• build on Latino cultural understanding of <i>promotoras</i></li> <li>• address higher HIV info needs of Latino MSM</li> <li>• place of sexual orientation in YPLs lives</li> <li>• referral skills</li> </ul> <p>Settings - in locales known to have high nos. of Latino farm workers</p> | +++                                     | +++                                      | +++                                   | ++                                     | +++                                     | ++                                     | ++                                 |

| <b>First Author &amp; Location</b>      | <b>Intervention</b>                                                                                                        | <b>Adaptation of intervention activities to increase cultural appropriateness</b>                                                                                             | <b>Mechanisms of adaptation 'authenticity'</b> | <b>Mechanisms of adaptation 'understanding'</b> | <b>Mechanisms of adaptation 'consonance'</b> | <b>Mechanisms of adaptation 'specificity'</b> | <b>Mechanisms of adaptation 'embeddedness'</b> | <b>Mechanisms of adaptation 'endorsement'</b> | <b>Mechanisms of adaptation 'framing'</b> |
|-----------------------------------------|----------------------------------------------------------------------------------------------------------------------------|-------------------------------------------------------------------------------------------------------------------------------------------------------------------------------|------------------------------------------------|-------------------------------------------------|----------------------------------------------|-----------------------------------------------|------------------------------------------------|-----------------------------------------------|-------------------------------------------|
| <b>Soskolne (2002)</b><br><b>Israel</b> | Overview of model for the development of HIV/AIDS programs for immigrants using several programs examples as case studies: | Model proposes an iterative approach to program development, involving immigrants as 'cultural insighters' for programs specific to immigrant youth and Ethiopian immigrants. |                                                |                                                 |                                              |                                               |                                                |                                               |                                           |
|                                         | 1. Immigrant youth from the former Soviet Union and Ethiopia                                                               |                                                                                                                                                                               | 1. ++                                          | 1. +                                            | 1. ++                                        | 1. +                                          | 1. X                                           | 1. X                                          | 1. X                                      |
|                                         | 2. Ethiopian immigrants                                                                                                    |                                                                                                                                                                               | 2. +                                           | 2. X                                            | 2. ++                                        | 2. ++                                         | 2. X                                           | 2. X                                          | 2. X                                      |

| First Author & Location     | Intervention                                                                                                                                                                | Adaptation of intervention activities to increase cultural appropriateness                                                                                                                                                                                                                                                                                             | Mechanisms of adaptation 'authenticity' | Mechanisms of adaptation 'understanding' | Mechanisms of adaptation 'consonance' | Mechanisms of adaptation 'specificity' | Mechanisms of adaptation 'embeddedness' | Mechanisms of adaptation 'endorsement' | Mechanisms of adaptation 'framing' |
|-----------------------------|-----------------------------------------------------------------------------------------------------------------------------------------------------------------------------|------------------------------------------------------------------------------------------------------------------------------------------------------------------------------------------------------------------------------------------------------------------------------------------------------------------------------------------------------------------------|-----------------------------------------|------------------------------------------|---------------------------------------|----------------------------------------|-----------------------------------------|----------------------------------------|------------------------------------|
| Worth (2003)<br>New Zealand | National HIV/AIDS Refugee Health Education Program which comprised training BCEs , developing community-specific action plans, workshops, resource development, support for | Language – various African languages used in workshops<br><br>Bilingual Community Educators (BCEs) – from a range of Sub-Saharan African backgrounds<br><br>Content- of education workshops and health promotion resources- used ABC<br><br>Settings-used a variety of community settings for workshops and developed community HIV/AIDS health promotion action plans | +++                                     | +++                                      | ++                                    | +++                                    | +++                                     | ++                                     | +++                                |
